# Supplementary material for: Muscle defects due to perturbed somite segmentation contribute to late adult scoliosis
Source: publisher site journal article supplement (doi:10.18632/aging.103856), 2020-09-25
Supplement: Supplementary file [file aging-v12i18-103856-supplementary-material-SD2.pdf]

## SUPPLEMENTARY CUSTOM MACROS

```
for(i=10; i<=3000; i=i+10){
print(i);
run("Image Sequence...", "open=["+%FIRST IMAGE OF EXAMPLE DATASET.tiff%"] number=10 starting="+i+"
increment=1 scale=100 file=[] or=[] sort");
run("Z Project...", "projection=[Sum Slices]");
saveAs("Tiff", "%INTENDED FOLDER FOR VIRTUAL THIN SECTION DATA%");
close();
close();
}
```
